# Supplementary material for: The Feed Additive Potassium Diformate Prevents Salmonella enterica Serovar Pullorum Infection and Affects Intestinal Flora in Chickens
Source: MDPI journal article supplement (doi:10.3390/antibiotics11091265), 2022-09-18
Supplement: s1 [file s1]

## Supplementary Materials

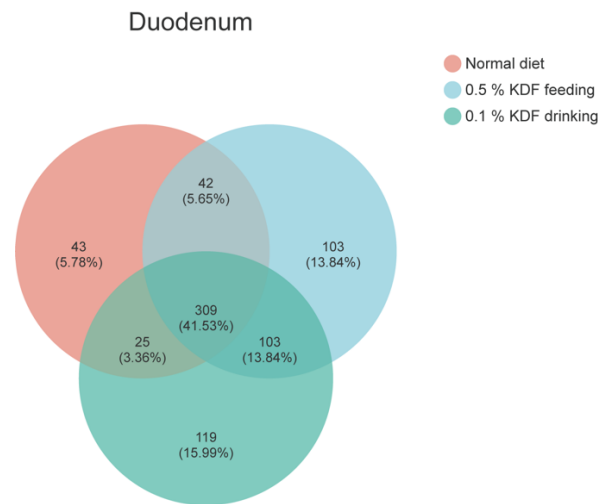

**Figure S1.** Venn diagram analysis of species based on OTU levels in intestinal flora of duodenum.

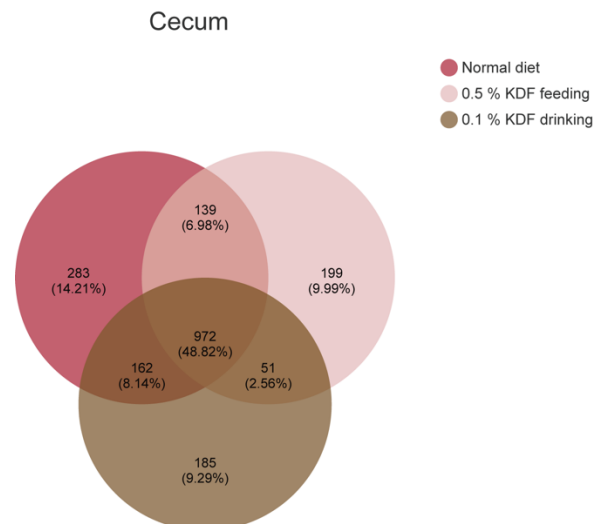

**Figure S2.** Venn diagram analysis of species based on OTU levels in intestinal flora of Cecum.

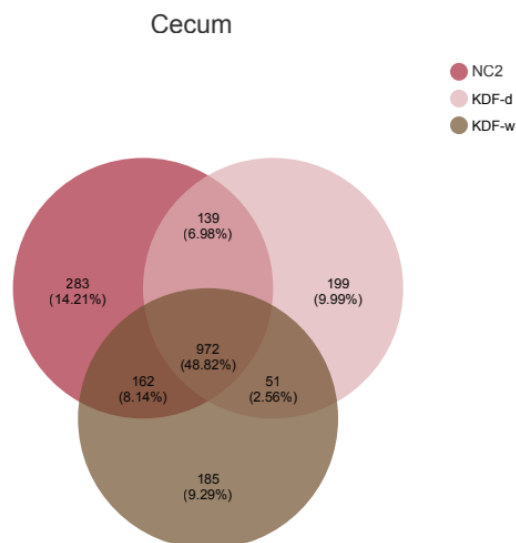

**Figure S3.** Venn diagram analysis of species based on OTU levels in intestinal flora of the cecum.

**Table S1.** Valid sequence numbers of each sample.

| Intestinal segment | Sample Name        | Sequence number |
|--------------------|--------------------|-----------------|
| <b>Duodenum</b>    | Normal diet        |                 |
|                    | DC1                | 109958          |
|                    | DC2                | 85932           |
|                    | DC3                | 106668          |
|                    | DC4                | 100132          |
|                    | DC5                | 60069           |
|                    | DC6                | 111345          |
|                    | 0.5 % KDF feeding  |                 |
|                    | DF1                | 88380           |
|                    | DF2                | 89947           |
|                    | DF3                | 119747          |
|                    | DF4                | 83262           |
|                    | DF5                | 73058           |
|                    | DF6                | 73724           |
|                    | 0.1 % KDF drinking |                 |
|                    | DD1                | 98179           |
|                    | DD2                | 73807           |
|                    | DD3                | 112416          |
|                    | DD4                | 148898          |
|                    | DD5                | 64194           |
|                    | DD6                | 84507           |
| <b>Cecum</b>       | Normal diet        |                 |
|                    | CC1                | 116910          |
|                    | CC2                | 122786          |
|                    | CC3                | 117775          |
|                    | CC4                | 84196           |
|                    | CC5                | 83389           |
|                    | CC6                | 84793           |
|                    | 0.5 % KDF feeding  |                 |
|                    | CF1                | 83866           |
|                    | CF2                | 198371          |
|                    | CF3                | 159898          |
|                    | CF4                | 151808          |
|                    | CF5                | 135463          |
|                    | CF6                | 85856           |
|                    | 0.1 % KDF drinking |                 |
|                    | CD1                | 115935          |
|                    | CD2                | 62077           |
|                    | CD3                | 60111           |
|                    | CD4                | 32748           |
|                    | CD5                | 120133          |
|                    | CD6                | 68676           |

DC, Duodenal contents of normally fed chickens; DD, Duodenal contents of chickens fed with 0.5% KDF; DF, Duodenal contents of chickens supplied with 0.1% KDF in drinking water; CC, Cecum contents of normally fed chickens; CD, Cecum contents of chickens fed with 0.5% KDF; CF, Cecum contents of chickens supplied with 0.1% KDF in drinking water.
